1 **The timescale and magnitude of 1/f aperiodic activity decrease with cortical**  
2 **depth in humans, macaques, and mice**

3 Mila Halgren<sup>1,2</sup>, Raphi Kang<sup>1</sup>, Bradley Voytek<sup>3</sup>, Istvan Ulbert<sup>4,5</sup>, Daniel Fabo<sup>6</sup>, Lorand Eross<sup>5,7</sup>,  
4 Lucia Wittner<sup>4,5</sup>, Joseph Madsen<sup>8</sup>, Werner K Doyle<sup>9</sup>, Orrin Devinsky<sup>9</sup>, Eric Halgren<sup>10</sup>, Mark T.  
5 Harnett<sup>\*1,2</sup>, Sydney S. Cash<sup>\*11</sup>

6 \* these authors contributed equally to the manuscript.

7 Correspondence: [mhalgren@mit.edu](mailto:mhalgren@mit.edu)

8

9 **Affiliations**

10 1. Department of Brain & Cognitive Sciences, Massachusetts Institute of Technology, Cambridge, MA  
11 02139

12 2. McGovern Institute for Brain Research, Massachusetts Institute of Technology, Cambridge, MA 02139

13 3. Department of Cognitive Sciences and Halıcıoğlu Data Science Institute, University of California San  
14 Diego, La Jolla, CA 93093

15 4. Institute of Cognitive Neuroscience and Psychology, Research Center for Natural Sciences, Eötvös  
16 Loránd Research Network, Budapest 1117, Hungary

17 5. Faculty of Information Technology and Bionics, Péter Pázmány Catholic University, Budapest 1088,  
18 Hungary

19 6. Epilepsy Centrum, National Institute of Clinical Neurosciences, 1145 Budapest, Hungary

20 7. Department of Functional Neurosurgery, National Institute of Clinical Neurosciences, 1145 Budapest,  
21 Hungary

22 8. Departments of Neurosurgery, Boston Children's Hospital and Harvard Medical School, Boston, MA,  
23 02115

24 9. Comprehensive Epilepsy Center, New York University School of Medicine, New York, NY 10016

25 10. Department of Neurosciences and Radiology, University of California San Diego, La Jolla, CA 93093

26 11. Department of Neurology, Massachusetts General Hospital, Harvard Medical School, Boston, MA  
27 02114

28 **Abstract**

29 Cortical dynamics obey a 1/f power law, exhibiting an exponential decay of spectral power with  
30 increasing frequency. The slope and offset of this 1/f decay reflect the timescale and magnitude of  
31 aperiodic neural activity, respectively. These properties are tightly linked to cellular and circuit  
32 mechanisms (e.g. excitation:inhibition balance and firing rates) as well as cognitive processes (e.g.  
33 perception, memory, and state). However, the physiology underlying the 1/f power law in cortical  
34 dynamics is not well understood. Here, we compared laminar recordings from human, macaque  
35 and mouse cortex to evaluate how 1/f aperiodic dynamics vary across cortical layers and species.  
36 We report that 1/f slope is steepest in superficial layers and flattest in deep layers in each species.  
37 Additionally, the magnitude of this 1/f decay is greatest in superficial cortex and decreases with  
38 depth. We could account for both of these findings with a simple model in which superficial  
39 cortical transmembrane currents had longer time constants and greater densities than those in  
40 deeper layers. Together, our results provide novel insight into the organization of cortical  
41 dynamics, suggesting that the amplitude and time constant of local currents control circuit  
42 processing as a function of laminar depth. This may represent a general mechanism to facilitate  
43 appropriate integration of fast sensory inputs (infragranular) with slow feedback-type inputs  
44 (supragranular) across cortical areas and species.

45

## 46 Introduction

47 Local field potentials (LFPs) in cortex exhibit pronounced oscillations of various  
48 frequencies (Buzsáki and Draguhn, 2004). Across the power-spectral-density (PSD) relationship,  
49 narrow-band oscillations such as alpha or gamma manifest as increases ('bumps') superimposed  
50 on a ramp of gradually decreasing power with increasing frequency (**Fig. 1c**). Across spatial scales,  
51 behavioral states and animals, this ramp is accurately modeled by an exponential function. This  
52 ramp of decreasing power, known as "1/f activity", is aperiodic and conceptually distinct from  
53 rhythms like alpha or gamma, which are superimposed on it (**Fig. 1c**) (Gao, 2016).

54 1/f activity was previously disregarded as noise, but recent studies have shown that its  
55 slope and offset are correlated with cognition and behavior (Bódizs et al., 2021; Colombo et al.,  
56 2019; Freeman and Zhai, 2009; Gao et al., 2020; Lendner et al., 2020; Miller et al., 2009b; Ouyang  
57 et al., 2020; Podvalny et al., 2015; Waschke et al., 2021), age (Dave et al., 2018; Schaworonkow  
58 and Voytek, 2021; Voytek et al., 2015), pharmacological manipulation (Stock et al., 2019;  
59 Timmermann et al., 2019), and disease (Robertson et al., 2019; Veerakumar et al., 2019). Despite  
60 tracking such a broad range of biological and cognitive phenomena, the neural substrate(s) of 1/f  
61 activity remain unknown. Physiologically, 1/f may be a result of self-organized-criticality (Beggs  
62 and Plenz, 2003; V. Stewart and Plenz, 2006), population dynamics (Chaudhuri et al., 2018;  
63 Podvalny et al., 2015) or E-I balance (Gao et al., 2017).

64 1/f aperiodic dynamics can be quantified by a  $P \propto b * f^{-\alpha}$  power law, where  $P$  is power,  
65  $f$  is frequency,  $b$  is a constant, and  $\alpha$  is a positive exponent between .5 and 4 (He, 2014).  
66 Arithmetically,  $\log P \propto \log b + \log f^{-\alpha}$ , is the same as  $\log P \propto -\alpha * \log f + \log b$ . Therefore,  
67 log power is linearly related to log-frequency (**Fig. 1c**). In this formulation,  $\alpha$  is the slope of (log)  
68 power as a function of (log) frequency, and  $\log b$  is its offset (though the PSD's slope is negative,  
69 we refer to the slope  $\alpha$  as positive by convention). The offset of this 1/f decay, or the power at  
70 which it intercepts the y-axis at  $f = 0 \text{ Hz}$ , is proportional to the broadband amplitude of the LFP.  
71 Physiologically, this offset may correspond to mean firing rates or cortical activation (Manning et  
72 al., 2009; Miller et al., 2009a). The slope of this 1/f decay indicates a characteristic timescale, or  
73 memory, of the underlying signal (Milotti, 2002; Podvalny et al., 2015) (for the LFP,  
74 transmembrane currents (Buzsáki et al., 2012)). A slope of zero (flat 1/f) is the spectral  
75 representation of Poisson noise, and indicates no history-dependence; conversely, a large-

76 magnitude slope (steep  $1/f$ ) indicates strong history dependence, or a long characteristic timescale  
77 (**Supplementary Fig. 1**). This timescale reflects the degree of integrative processing in different  
78 areas: sensory cortex has a short timescale, while association cortex exhibits a long one. Certain  
79 behavioral tasks also exhibit different characteristic timescales (Gao et al., 2020).

80         Though previous studies have demonstrated that cortical LFPs obey a  $1/f$  power law  
81 (Freeman and Zhai, 2009; He et al., 2010; Miller et al., 2009a; Voytek et al., 2015), none have  
82 measured whether  $1/f$  dynamics change across cortical layers. This is important for understanding  
83 the generation of  $1/f$  dynamics, as different cortical layers have distinct functional and anatomical  
84 properties and could be differentially responsible for generating aperiodic activity (He et al., 2010).  
85 Characterizing  $1/f$  activity across layers could also tell us which laminae drive  $1/f$  dynamics in  
86 scalp EEG and MEG. Insofar as the slope of the  $1/f$  indicates a characteristic timescale of local  
87 processing (**Supplementary Fig. 1**) (Milotti, 2002), it may also indicate whether different cortical  
88 layers are specialized for integration over long periods versus fast non-integrative processing. To  
89 address this, we used microelectrode recordings made from humans, macaques and mice to  
90 measure the slope and offset of  $1/f$  activity across cortical layers. We find that  $1/f$  activity decreases  
91 in slope and offset with increasing cortical depth. Intriguingly, this relationship held across three  
92 mammalian species and multiple cortical areas.

93

## 94 **Results**

95 To measure human cortical PSDs from different layers simultaneously, we made laminar  
96 microelectrode recordings in 16 patients with medically intractable epilepsy (Halgren et al., 2018;  
97 István Ulbert et al., 2001) (**Fig. 1a-b**). During the implantation of clinical macroelectrodes, laminar  
98 microelectrode arrays were inserted into cortex expected to be resected. Each probe had 24  
99 channels with  $150\ \mu\text{m}$  spacing, allowing us to record local field potentials throughout the cortical  
100 depth. To attenuate volume conduction, we referenced each contact to its neighbor, yielding the  
101 local-field-potential-gradient (LFPg) at 2000 Hz (filtered 0.2 – 500 Hz) (Halgren et al., 2018;  
102 Kajikawa and Schoeder, 2012; István Ulbert et al., 2001) (**Fig. 2a-b**). The LFPg yields a more  
103 focal measure of neural activity than the monopolar LFP without being as sensitive to noise as  
104 current-source-density (Trongnetrpunya et al., 2016). We analyzed data from epochs of quiet  
105 wakefulness, sleep, or when the state was unknown. When recordings from multiple states were

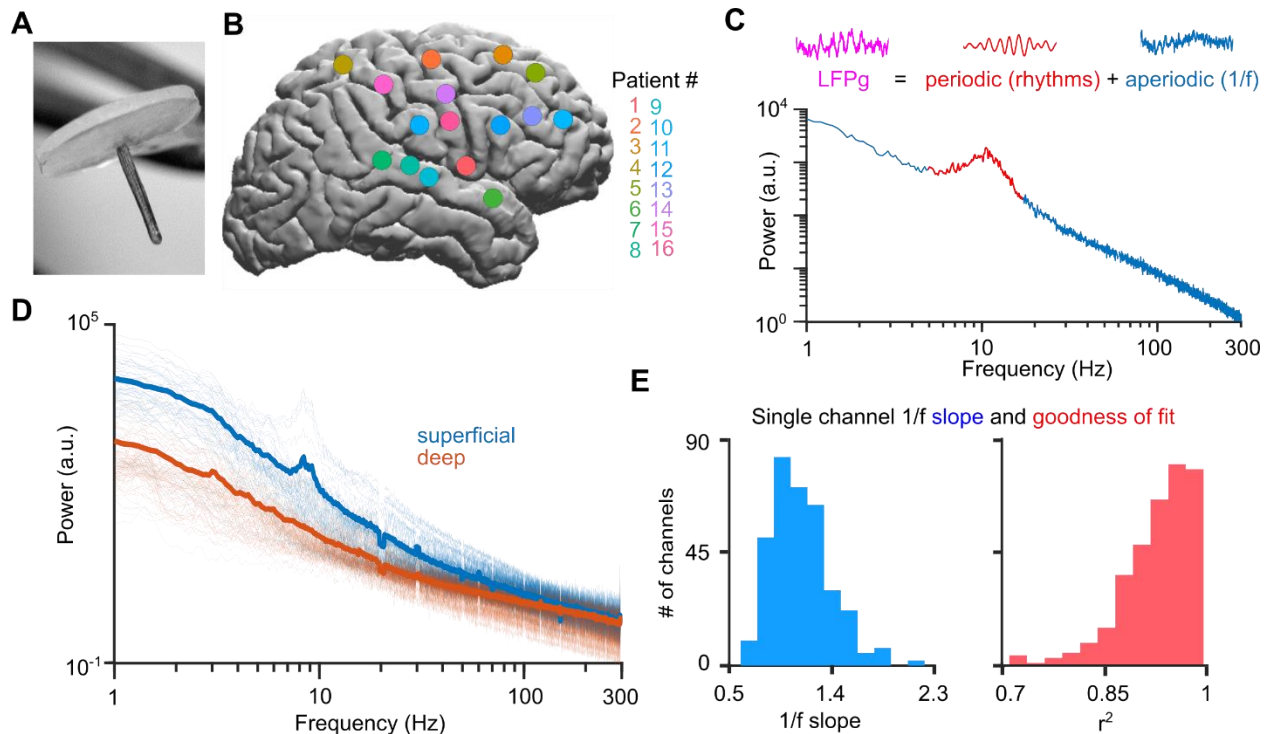

**Figure 1:** Laminar electrodes and aperiodic dynamics in humans. **(a)** Photomicrograph of a laminar array. Note the circular silastic sheet on top (adapted with permission from Ulbert et al., 2001). **(b)** Approximate locations of laminar implantations. We recorded from association cortex likely to be removed in prefrontal, temporal and parietal lobes. **(c)** Example wideband LFPg recording (purple trace) and power spectra (with 1/f fit) from Pt. 6, decomposed into periodic (red peak above 1/f line, red trace LFP bandpassed from 5-17 Hz) and aperiodic (blue power spectral density, blue time series bandstopped from 5-17 Hz) components. All LFPg traces are 1s. **(d)** All power spectra (light shade) and their means (dark) in superficial (blue, estimated layers I/II) and deep (orange, estimated layers V/VI) laminae. Superficial power spectra are both steeper and have greater offsets than deep ones. **(e)** Distribution of 1/f slopes and model fits to the 1/f.

106 available in a patient, we pooled data across states before further analysis, but patients in whom  
 107 only sleep (Pts. 4, 5, 10) or wakefulness (Pt. 7) was recorded showed qualitatively similar effects.  
 108 We then used Welch’s method to measure the Fourier Transform averaged across these epochs (10  
 109 second windows, single Hanning taper), giving us the PSD at each cortical depth (Halgren et al.,  
 110 2018) (**Fig. 2c**). Though laminar probes span the cortical depth, the exact cortical layer can only  
 111 be estimated based on previous measurements of laminar width(Hutsler et al., 2005).

112 Averaged PSDs from superficial layers (150 - 750  $\mu\text{m}$ , layers I/II) exhibited both steeper  
 113 slope and greater offset than deeper layers (2400-3450  $\mu\text{m}$ , layers V/VI) (**Fig. 1d**). To quantify  
 114 this, we fit slopes to the PSD for each channel using the spectral parameterization package  
 115 (Donoghue et al., 2020). Briefly, the algorithm fits the aperiodic 1/f after removing Gaussian-fitted

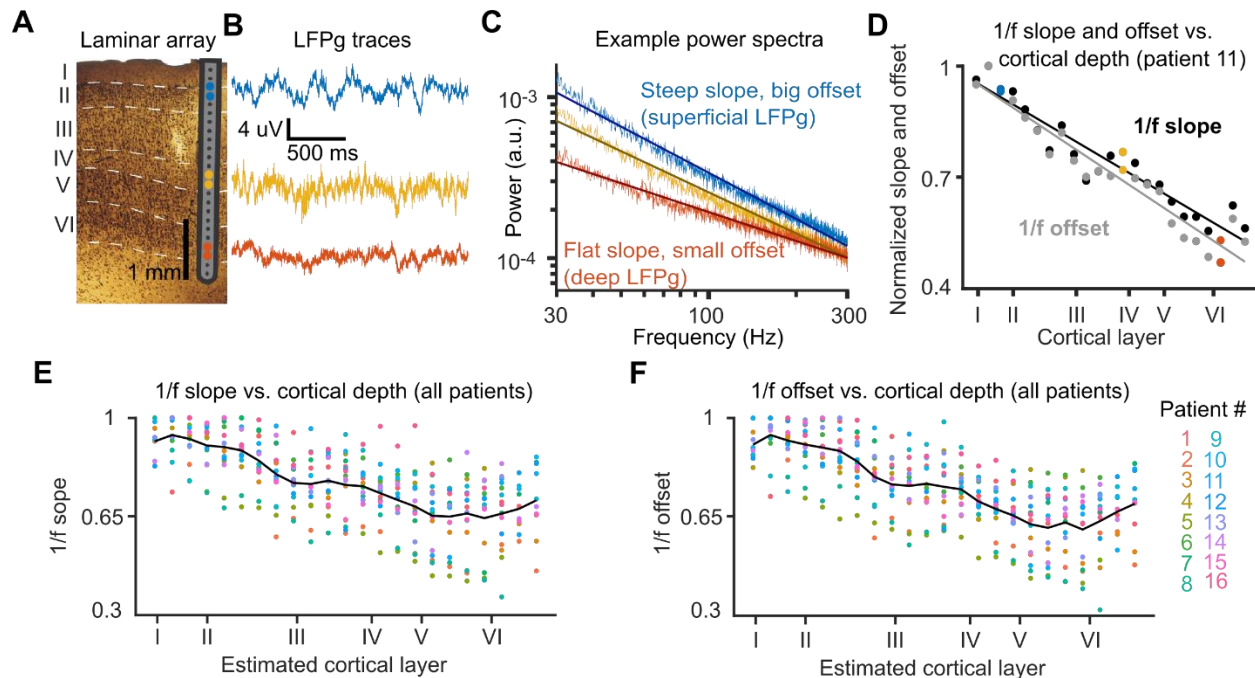

**Figure 2:** 1/f slope fitting analysis in an example human patient. **(a)** Pt. 11's laminar microelectrode array overlaid on a histological section of the tissue surrounding the probe; note that the array spans the gray matter. **(b)** Sample traces of the local-field-potential-gradient (i.e. the voltage difference between adjacent contacts) in superficial, middle and deep cortical layers. **(c)** 1/f power spectra (on a log-log scale) with fitted slopes from the spectral parameterization algorithm. Note that power spectra are well fit by a straight line, and that superficial channels (blue) have steeper slopes, whereas deep channels (orange) have flatter slopes. To emphasize this effect, we show these spectra from 30 – 290 Hz (though we fit on 1– 290 Hz). **(d)** The slope and offset of each channel's power spectrum versus cortical depth in this participant. The slope flattens (i.e. becomes less negative) and offset decreases with increased depth – the colored dots come from the same sites as the colored traces and power spectra in **(b)** and **(c)**. **(e)** 1/f slope and **(f)** offsets across all patients and contacts, normalized within patients.

116 narrowband-oscillations which manifest as peaks on top of the 1/f. We fit the slope of each PSD  
 117 from 1-290 Hz to capture spectral slope over a broad range. The spectral parameterization  
 118 algorithm was effective at fitting our slopes, with an  $r^2$  across all channels of  $.93 \pm .003$  (**Fig. 1e**).  
 119 Observed slopes were in the range of 0.60-2.21 (**Fig. 1e**), similar to previously reported values in  
 120 human intracranial recordings (He et al., 2010; Lendner et al., 2020; Miller et al., 2009a; Voytek  
 121 et al., 2015). However, comparing absolute slope and offset values across different recordings is  
 122 problematic: differences in hardware and ambient noise can affect these measurements. Therefore,  
 123 the most meaningful comparisons are of 1/f slope and offset within a recording (i.e. within patients)  
 124 across channels. To implement this, we normalized all 1/f slopes and offsets within patients before



125 visualization, such that the steepest (most negative) slope and largest offset had a value of 1 (**Fig.**  
126 **2d**).

127 We first examined the relationship between 1/f slope and cortical depth within single  
128 patients. All 16 patients had a significant correlation ( $p < .05$ , uncorrected Pearson's R) between  
129 cortical depth and 1/f slope; in all of these 16 recordings, 1/f slopes became flatter (less negative)  
130 in deeper layers, significantly more than expected by chance ( $p < .001$ , binomial test)  
131 (**Supplementary Fig. 2a**). The strength of this association varied, with  $r$  values ranging from  $-.95$   
132 to  $-.56$  across patients, but on average (across patients) cortical depth explained nearly two-thirds  
133 of the variance of 1/f slope ( $r = -.78 \pm .03$ ,  $r^2 = .62 \pm .05$ ,  $\text{mean} \pm \text{standard error of the mean (SEM)}$ )  
134 across patients). This can also be seen clearly by pooling data across patients (**Fig. 2e**). 1/f offset  
135 was also clearly related to cortical depth (**Fig. 2f**). Offset significantly decreased with cortical

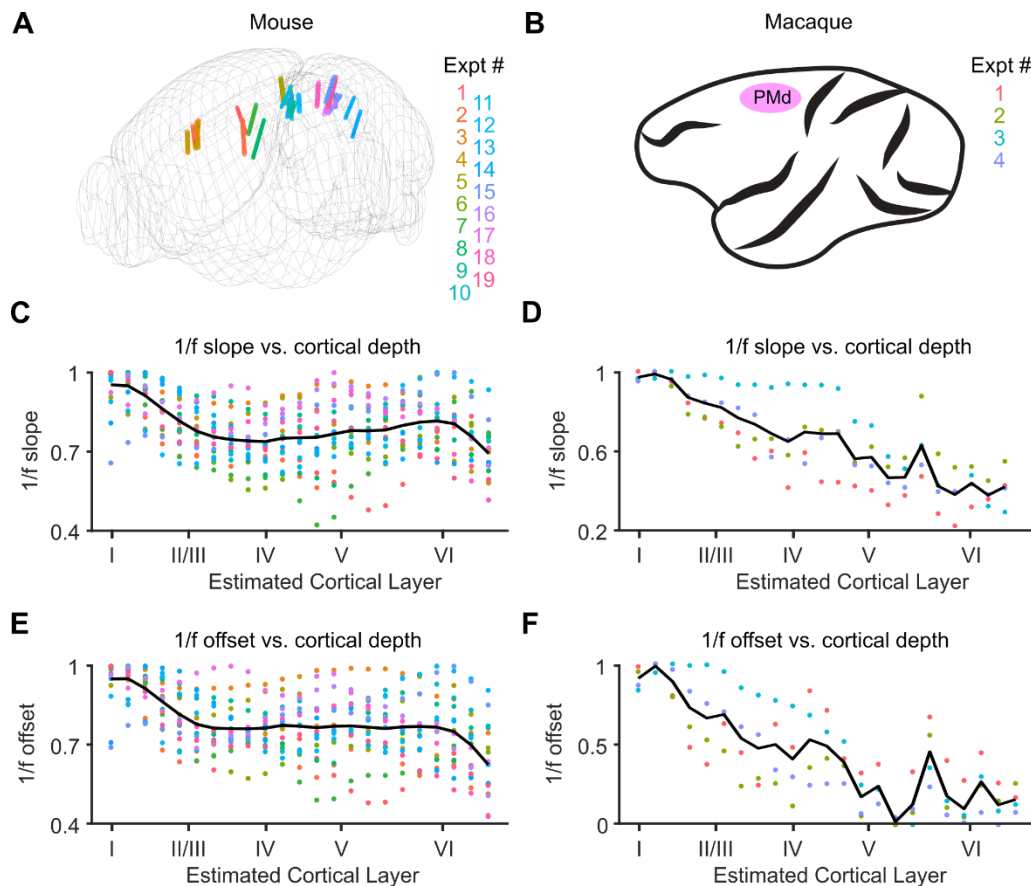

**Figure 3:** 1/f fitting in macaque and mouse laminar recordings. (a) Approximate locations of Neuropixel probes. When multiple recordings were made from the same cortical area within the same mouse, the probes share the same color. (b) All macaque recordings were made from dorsal premotor cortex (PMd). (c) 1/f slope in mice and (d) macaques versus cortical depth, normalized within sessions. (e) 1/f slope in mice and (f) macaques versus cortical depth, normalized within sessions. (e-f as in **Fig. 2e-f**).

136 depth in all 16 patients ( $r = -.79 \pm .03$  across patients), similar to slope, indicating that broadband  
137 aperiodic activity is smaller in deep cortical layers (**Supplementary Fig. 3a**).

138 Were our results specific to humans or did they represent a general principle for  
139 mammalian cortical dynamics? To test this, we analyzed laminar recordings of spontaneous  
140 cortical activity in mice (Steinmetz et al., 2019) and macaques using Neuropixel probes. Mouse  
141 recordings were made from seven cortical areas, including visual, somatosensory, motor and  
142 retrosplenial cortex (**Fig. 3a, Table 1**); all macaque recordings were made from dorsal premotor  
143 cortex (PMd) (**Fig. 3b**). We selected experiments in which the probe was implanted approximately  
144 normal to the brain's surface, and only analyzed contacts labeled as within the cortex. In order to  
145 make these recordings as comparable as possible to our human data, we spatially interpolated  
146 across channels to yield 23 bipolar LFPg series evenly spanning the cortical depth. Just as in  
147 humans, we used the spectral parametrization algorithm to quantify aperiodic slope and offset from  
148 1-290 Hz with a strong goodness-of-fit (mouse:  $r^2 = .92$ , macaque:  $r^2 = .97$  across single channels)  
149 and a plausible range of slopes (mouse: 0.81-2.55, macaque: 0.2-1.47). We found that 1/f slope  
150 (mouse:  $r = -.36 \pm .11$ , macaque:  $r = -.88 \pm .04$  across experiments) and offset (mouse:  $r = -.47 \pm$   
151  $.12$ , macaque:  $r = -.80 \pm .08$  across experiments) both decreased with cortical depth (**Fig. 3c-f,**  
152 **Supplementary Fig. 2b, 3b**,  $n=9$  mice, 1 macaque).

153 Slope and offset were strongly correlated in each species (human:  $r^2 = .94$ ,  $p < 10^{-10}$ , mouse:  
154  $r^2 = .89$ ,  $p < 10^{-10}$ , macaque:  $r^2 = .85$ ,  $p < 10^{-10}$ ), even when depth was controlled for (human:  $r^2 =$   
155  $.92$ ,  $p < 10^{-10}$ , mouse:  $r^2 = .95$ ,  $p < 10^{-10}$ , macaque:  $r^2 = .79$ ,  $p < 10^{-10}$ ) (**Fig. 4b**). This strong  
156 relationship between slope and offset is mathematically equivalent to the power spectra of adjacent  
157 channels having a consistent x-intercept, and therefore “rotating” around a fixed frequency axis  
158 (**Fig. 4a**). If two power spectra intersect, a difference in their slopes will necessarily be  
159 accompanied by a proportional difference in their offsets (or vice-versa). Indeed, we found that  
160 throughout our datasets, the power spectra of adjacent channels consistently intersected at a similar  
161 median (human median: 106.77 Hz, mouse median: 115.41 Hz, macaque median: 28.68 Hz) (**Fig.**  
162 **4c**).

163 What might account for these robust differences in aperiodic dynamics across laminae?  
164 Several studies have shown that if the LFP is modelled by a Poisson spike train convolved with a  
165 postsynaptic conductance (PSG), and this PSG takes the form of a double-exponential, a 1/f power



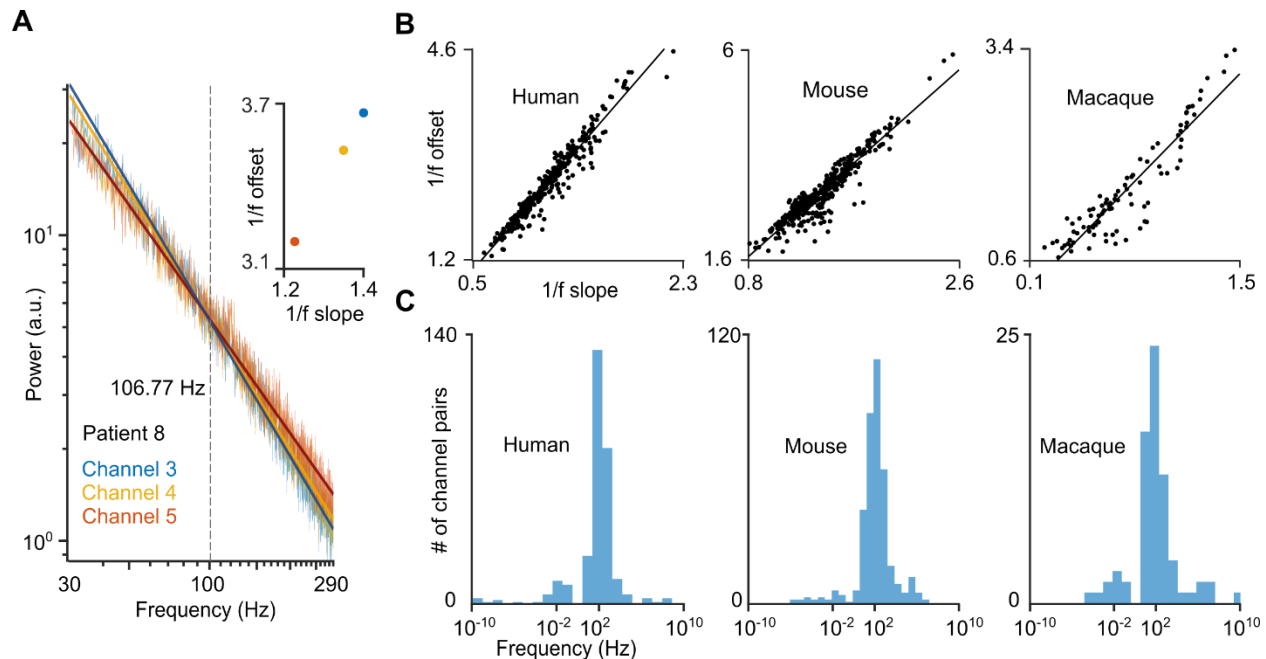

**Figure 4:** A common axis of rotation explains the correlation between 1/f slope and offset. **(a)** Three consecutive power spectra in an example patient; each of them intersect at approximately the same frequency of 106.77 Hz, the median intersection of all neighboring channels in humans. As seen in the inset, slope and offset are tightly correlated due to this common intersection. **(b)** 1/f slope versus offset for all single channels in each species. Note that 1/f slope and offset are highly correlated. **(c)** All intersection frequencies of neighboring power spectra across species; for visualization purposes, the 5<sup>th</sup> percentile of highest and lowest intersection points in humans and mice, and the 10<sup>th</sup> and 90<sup>th</sup> in macaques, were excluded.

166 law emerges naturally (Freeman and Zhai, 2009; Gao et al., 2017; Miller et al., 2009a). This  
 167 framework was used to show that a greater balance of inhibition over excitation (i.e. more GABA<sub>A</sub>  
 168 than AMPA PSGs) is associated with steeper 1/f slopes (Gao et al., 2017). Mathematically, this is  
 169 due to the slower post-synaptic time constant of GABA<sub>A</sub> compared to AMPA. Intuitively, a slower  
 170 PSG will result in slower aperiodic dynamics, and therefore a steeper 1/f slope (as it has more low-  
 171 frequency spectral power). A second discovery of these models is that the offset of 1/f power is  
 172 directly related to the number of PSGs active; this has been previously used to argue that 1/f offset  
 173 reflects mean firing rates (Miller et al., 2009a). Alternatively, differences in 1/f offset might reflect  
 174 differences in postsynaptic receptor density (rather than differences in activation due to  
 175 presynaptic firing). If each receptor is activated at an equal rate, an increase in receptor density  
 176 should lead to an increase in postsynaptic currents and 1/f offset, or broadband LFP power.  
 177 Accordingly, our results could be accounted for if: 1) aperiodic dynamics are affected by the time  
 178 course of postsynaptic currents, 2) the ratio of postsynaptic channels activated with slow vs. fast  
 179 time constants is largest in superficial layers, and 3) there is a greater receptor density in superficial

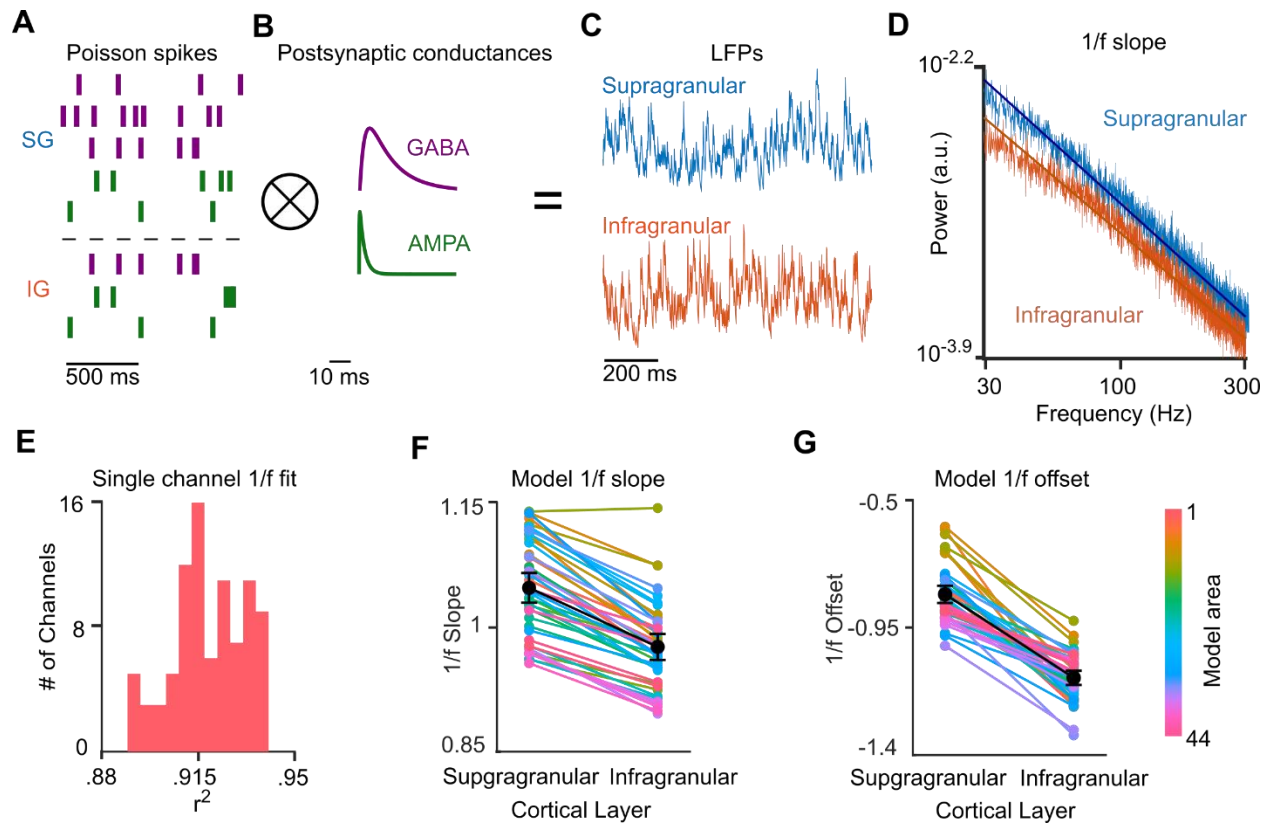

**Figure 5:** A simple model of 1/f dynamics across cortical layers based on AMPA and GABA<sub>A</sub> receptor kinetics. (a) Poisson spikes corresponding to the fmol/mg density of GABA<sub>A</sub> and AMPA in supragranular and infragranular layers are convolved with the (b) postsynaptic conductances (PSG) of these receptors. These yield LFPs (c) with log-linear power spectra (d), similar to our experimental recordings (see Fig. 2c). These spectra were then fit in log-log space with a straight line using the spectral parameterization algorithm (e). The slopes (f) and offsets (g) of these lines are higher in superficial than deep layers across areas.

180 than deep layers. We therefore hypothesized that a simple model which incorporates empirical  
 181 receptor densities across layers in human cortex might reproduce the 1/f differences we observe  
 182 with our laminar probes. Specifically, we utilized a database of receptor densities in 44 different  
 183 cortical areas made from ex-vivo human tissue with autoradiography (Zilles and Palomero-  
 184 Gallagher, 2017). Following previous work in modelling 1/f dynamics, we chose to model only  
 185 the effects of ligand-gated AMPA and GABA<sub>A</sub> receptors on the 1/f; these currents dominate  
 186 excitatory and inhibitory postsynaptic currents in neocortex, respectively (Kandel et al., 1991). For  
 187 each area, we generated two LFPs (and their PSDs) corresponding to supragranular and  
 188 infragranular layers. Each LFP was generated by convolving Poisson spike trains (30 Hz) (Fig.  
 189 5a) with AMPA and GABA<sub>A</sub> PSGs drawn from aggregating previous studies (Fig. 5b) (CNRG  
 190 Lab @ UWaterloo, *Neurotransmitter Time Constants*). The number of spike trains convolved with  
 191 AMPA and GABA<sub>A</sub> PSGs was equal to the density of each receptor in fmol/mg within that layer.

192 Summing across these Poisson spikes yielded model LFPs for each layer and area (**Fig. 5c**). When  
193 we took the PSDs of these simulated LFPs (with the same window and taper we used on our actual  
194 laminar recordings), they were linear in log-log space (**Fig. 5d-e**) (goodness of linear log-log fit:  
195  $r^2 = .9980$  for supragranular,  $r^2 = .9968$  for infragranular), and simulated 1/f slope was steeper in  
196 supragranular than infragranular layers for 43/44 model cortical areas (**Fig. 5f**) ( $p < 5.68 * 10^{-14}$ ;  
197 mean supragranular slope: -1.6243, mean infragranular slope: -1.4639, 7.29% difference in slope  
198 on average). 1/f offset was also greater in superficial than deep layers of all 44 model cortical areas  
199 (**Fig. 5g**) ( $p < 2.56 * 10^{-12}$ ; mean supragranular offset: -0.83, mean infragranular offset: -1.13,  
200 25.92% difference in offset on average). These changes were comparable to our empirical changes  
201 in slope and offset between supragranular and infragranular cortex (22.48% rotation in slope,  
202 25.41% change in offset). Similar to our empirical data, model 1/f slopes were highly correlated  
203 with offsets across simulated spectra ( $r^2 = .49$ ,  $p < 3.49 * 10^{-14}$ ).

204

## 205 **Discussion**

206 We find that aperiodic activity flattens and decreases with cortical depth across several cortical  
207 regions and three mammalian species. This suggests that the timescale and magnitude of aperiodic  
208 currents decrease with cortical depth as a general principle of neocortical activity.

209 Our data is suggestive of potential interspecies differences in aperiodic dynamics; for  
210 instance, the relationship between aperiodic dynamics and cortical depth was notable stronger in  
211 macaques and humans than in mice (compare **Fig. 2c-d** and **Fig. 3c-f**). Unfortunately, differences  
212 in experimental conditions preclude direct comparisons between species. Distinctions in aperiodic  
213 dynamics across species could be due to different laminar probes (platinum-iridium vs. silicon),  
214 noise levels, or angles of insertion with respect to the cortical surface rather than physiological  
215 differences per se.

216 Using previously measured values of receptor density across human cortical layers in a  
217 simple model, we showed that the lower ratio of AMPA to GABA<sub>A</sub> receptors in superficial layers,  
218 as well as the larger absolute number of receptors within superficial layers, could partially account  
219 for differences in 1/f slope and offset across cortical laminae. Insofar as the LFP reflects the  
220 activity of active postsynaptic channels, currents with slower timescales will lead to steeper slopes.

221 Furthermore, the high density of receptors in superficial layers lead to greater 1/f offset (i.e.  
222 broadband power). Though several post-synaptic channels with long time constants such as  
223 NMDA are predominantly located in superficial layers (Eickhoff et al., 2007; Zilles and Palomero-  
224 Gallagher, 2017), we only modeled the effects of ligand-gated AMPA and GABA<sub>A</sub> receptors on  
225 the LFPg, similar to other recent models of 1/f activity The strong correlation of 1/f slope and  
226 offset suggests a common physiological factor; our model indicates this could be due to a high  
227 density of postsynaptic channels with long time-constants in superficial laminae. However, it is  
228 important to note that other (non-exclusive) factors also likely contribute to laminar differences in  
229 aperiodic dynamics. One other such factor includes voltage gated (active) channels. Specifically,  
230 h-currents may contribute to the steep slopes / slow aperiodic dynamics observed in supragranular  
231 laminae. Firstly, h-currents can strongly shape the extracellular LFP (Ness et al., 2018). Secondly,  
232 the density of h-channels on the dendrites of layer 5 cortical pyramidal cells increases with distance  
233 on the apical trunk from the soma (Harnett et al., 2015; Kole et al., 2006), mirroring the smooth  
234 increase in 1/f slope from deep to superficial cortex. Additionally, human supragranular cells  
235 exhibit higher densities of h-channels when compared to rodents (Beaulieu-Laroche et al., 2018;  
236 Kalmbach et al., 2018); this may explain why the correlation between 1/f slope and depth was  
237 stronger in primates than mice. Alternatively, our effects could be due to biophysical differences  
238 across cortical layers. For instance, a gradual change in cortical impedance across layers could  
239 lead to different 1/f slopes and offsets, though cortical impedance is isotropic in macaque cortex  
240 (Logothetis et al., 2007). Similarly, gray matter may intrinsically filter extracellular currents in a  
241 frequency-dependent manner (though this is highly contentious (Bédard et al., 2006; Bédard and  
242 Destexhe, 2009)) in a way that changes between layers. These other factors may be incorporated  
243 in future, more biophysically complete models.

244 We employed a bipolar referencing scheme to emphasize local activity (**Fig. 2a**).  
245 Monopolar LFP recordings, made with a distant reference, may show an entirely different  
246 relationship between 1/f dynamics and cortical depth (Shirhatti et al., 2016), likely due to  
247 contamination by volume conduction (Kajikawa and Schoeder, 2012). Because infragranular LFPs  
248 are particularly susceptible to volume conduction from superficial cortex (Kajikawa and  
249 Schroeder, 2015), a monopolar reference might even find the opposite of our results (i.e. 1/f slope  
250 and offset would increase with cortical depth), despite the neural generators of these aperiodic  
251 dynamics residing in superficial layers.

252 Previous work has shown that currents in superficial layers underlie low-frequency  
253 oscillations, which are distinct from the aperiodic dynamics reflected in  $1/f$  slope (Cash et al.,  
254 2009; Csercsa et al., 2010; Haegens et al., 2015; Halgren et al., 2015, 2019, 2018) (**Fig. 1c**).  
255 Crucially, the spectral parameterization algorithm is able to remove the oscillatory peaks before  
256 fitting the slope and offset of our power spectra. Furthermore, our results were robust even when  
257 slopes were fit from 30-290 Hz, far outside the range of delta, theta, alpha or beta oscillations  
258 (**Supplementary Fig. 5**). Therefore, both slow oscillatory activity and slow aperiodic dynamics  
259 are concentrated in superficial layers. It's possible that channels with long time constants (such as  
260 HCN or NMDA receptors) are responsible for sustaining both low-frequency oscillations and slow  
261 aperiodic dynamics. Whether this implies a common physiological origin should be explored in  
262 future work.

263 What do differences in  $1/f$  slope between cortical layers imply about the functional role of  
264 different laminae?  $1/f$  represents the history-dependence, or “memory” of the LFPg  
265 (**Supplementary Fig. 1**) (Milotti, 2002). For cognition, the brain must simultaneously represent  
266 multiple timescales at different orders of magnitude (Kiebel et al., 2008). Indeed, it's been  
267 previously shown that sensory cortex has the shortest processing timescales (presumably for  
268 encoding veridical representations of fast-changing stimuli), and that association cortex has the  
269 longest (Runyan et al., 2017). These timescales (as measured both by the LFPg and spiking)  
270 smoothly increase from lower to higher order cortex (Gao et al., 2020; Murray et al., 2014; Siegle  
271 et al., 2021; Spitmaan et al., 2020). Our work indicates that the gradation of neuronal timescales  
272 across areas is mirrored by differences in timescales across layers: currents in superficial layers  
273 have a longer timescale than currents in deep layers. This is anatomically expected, as superficial  
274 layers are the primary recipients of feedback and modulatory inputs (thought to have long  
275 timescales), whereas deeper layers receive more feedforward, driving inputs (thought to have a  
276 short timescales) (Markov et al., 2014). The long timescale of supragranular currents could allow  
277 them to have stronger integrative properties than infragranular currents, which may be specialized  
278 for faster bottom-up inputs.

279

## 280 **Materials and Methods**

### 281 *Human Laminal Recordings*

282 Laminar microelectrode arrays were inserted on the basis of two criteria: first, the tissue must be  
283 very likely to be resected (Istvan Ulbert et al., 2001). This could be because it was clearly within  
284 the seizure onset zone, or because it was healthy tissue overlying the seizure onset zone which  
285 would have to be removed during the resection. Secondly, the cortex in question must have had  
286 no chance of being eloquent. A silicone sheet attached to the array's top was used to keep the  
287 probe perpendicular to the cortical depth, with surface tension between the sheet and the pia, as  
288 well as pressure from the overlying grid and dura, keeping the array in place. This sheet also  
289 ensured that the laminar array was perpendicular to the cortex and that the first contact was  
290 placed ~150 microns below the cortical surface. Electrode impedances and phases were  
291 measured prior to implantation to ensure that recording properties were similar across contacts.  
292 Each laminar probe spanned the cortical depth with a length of 3.5 mm and diameter of .35 mm.  
293 Contacts had a 40-micron diameter spaced every 150 microns. Recordings were made during for  
294 an average of 17.32 minutes of task-free activity in each patient.

295 In patients 9 and 11, co-histology was performed on the tissue surrounding the laminar  
296 probe to confirm which layers each channel recorded from (**Fig. 2a**). In other patients, the  
297 correspondence of channels to individual laminae was approximated from previous  
298 measurements of laminar width. Channels 1, 4, 9, 14, 16 and 21 were the approximate centers of  
299 layers I-VI, respectively.

### 300 *Human clinical implantation details*

301 All data were visually inspected for movement, pulsation and machine artifacts. The data was  
302 also screened for epileptic activity such as interictal discharges and pathological delta by a board  
303 certified electroencephalographer. Laminar arrays with significant amounts of artifactual or  
304 epileptiform activity, and/or insufficient technical quality, were rejected prior to further analysis.  
305 All epochs with artefactual or epileptiform activity from accepted arrays were also excluded  
306 from analyses.

307

308 The effects of Anti-Epileptic Drugs (AED) on the LFP is a potential concern, as these  
309 sometimes affect scalp EEG (Blume, 2006). While some patients in this study may have been  
310 taking AEDs, most recordings were performed after the patient's medications had been tapered  
311 to encourage spontaneous seizure occurrences during the monitoring period. Critically, the



312 results were highly consistent across all participants regardless of medication history, etiology,  
313 electrode location, or degree of epileptic activity. Expert screening and consistency across  
314 participants strongly suggest that our findings are generalizable to the non-epileptic population.

315 Because we did not systematically track behavioral state with EMG or sleep-scoring from  
316 scalp EEG, we were not able to investigate the effect of state on 1/f dynamics. However, in a  
317 subset of patients recordings were made only during definitive wakefulness (Pt. 7) or sleep (Pts.  
318 4, 5, 10). The single-subject relationship between 1/f slope and offset with depth was highly  
319 similar in all cases (**Supplementary Fig. 2a, 3a**), suggesting that our findings generalize across  
320 states.

### 321 *Mouse laminar recordings*

322 Mouse recordings were used from “Distributed coding of choice, action, and engagement across  
323 the mouse brain”(Steinmetz et al., 2019). Details on these experiments, as well as all of the data  
324 we analyzed, can be found at  
325 ([https://figshare.com/articles/Dataset\\_from\\_Steinmetz\\_et\\_al\\_2019/9598406](https://figshare.com/articles/Dataset_from_Steinmetz_et_al_2019/9598406)). Only implantations  
326 which were approximately normal to the cortical surface were selected for further analysis, to  
327 avoid confounding cortical depth with lateral or anterior/posterior position. This was done by  
328 visual inspection of electrode trajectories on the Allen Institute common-coordinate-  
329 framework(Wang et al., 2020). However, because these recordings were not made with this in  
330 mind, these recordings were likely not as normal as our human recordings (**Fig. 3a**). Mice were  
331 headfixed to perform a visual contrast detection task. We analyzed both periods of spontaneous  
332 activity when the mouse was neither being presented stimuli nor actively performing a task  
333 (spontaneous.intervals.npy). When multiple sessions from the same cortical area in the same  
334 mouse were available, we averaged spectra across all available sessions.

335 Only channels labeled as being in cortex were analyzed. We first spatially averaged  
336 Neuropixel LFPs between consecutive blocks of four adjacent channels (yielding 96  
337 pseudochannels per probe) to reduce noise. Then, a spatial Gaussian filter with a standard  
338 deviation of 68  $\mu\text{m}$  was applied. To reject superficial contacts which were out of the brain, we  
339 only analyzed pseudochannels below or the pseudochannel immediately above the  
340 pseudochannel in which the most superficial unit was recorded. To make the spatial resolution of  
341 our recordings similar to humans, we then spatially interpolated evenly across the

342 pseudochannels to get LFP timeseries spanning the cortical depth. Finally, we took the difference  
343 between these adjacent channels to derive the 23 channel mouse LFPg.

#### 344 *Macaque Laminar Recordings*

345 Rhesus Neuropixels recordings (4 sessions, 1 macaque) were performed in dorsal premotor  
346 cortex (PMd) using Neuropixels NHP probes supplied by IMEC and Janelia. We analyzed an  
347 average of 37.42 minutes of task-free, spontaneous activity per session. The Neuropixels probe  
348 was inserted along the axis of the recording chamber with the intent to be orthogonal to the  
349 surface of the cortex and spanning cortical lamina. Neuropixels probes were inserted using a  
350 custom adapter to mount the probe on a microelectrode drive (Narishige). A blunt 23-gauge  
351 stainless steel guide tube was mounted in a second tower and positioned in contact with the  
352 surface of the dura. The granulation tissue and dura was perforated using a tungsten electrode,  
353 then the Neuropixels probe was inserted through the same guide tube into the brain. Recordings  
354 were performed using the 384 channels closest to the probe tip, spanning 3.84 mm of length  
355 along the probe. The recording depth was selected so as to situate the most superficial observable  
356 spiking neurons aligned with the top recording channel. LFP data were acquired using  
357 SpikeGLX software and were digitized at 1kHz. Before fitting these LFPs, we applied the same  
358 procedure to our macaque recordings that we applied to our mouse recordings (i.e. spatially  
359 averaging adjacent channels, interpolating, and then taking the potential difference between these  
360 pseudochannels).

#### 361 *Analysis*

362 All analysis was performed in MATLAB (R2019b, Natick, MA) using custom and FieldTrip  
363 functions (Oostenveld et al., 2011). In each participant, the Fourier Transform was calculated in  
364 10 second epochs on the zero-meaned data after a single Hanning taper was applied. FFTs were  
365 taken across all recordings made in each patient, even if recordings were made during multiple  
366 behavioral states, yielding a single 1/f slope at each cortical depth per patient. The frequency  
367 spectra of faulty channels (an average of 3 per probe) were linearly interpolated from the  
368 normalized frequency spectra of good channels above and below on the laminar probe. For  
369 instance, if channel 2 was defective, its power spectrum would be replaced by the average of  
370 channels 1 and 3's power spectra. To ensure that interpolation wasn't yielding spurious results,

371 we examined the 1/f depth profiles of patients without any interpolated channels (2, 3, 7, 8, 9).  
372 These patients displayed the same pattern as those with interpolated channels.

373 Power spectra were visually examined for noise peaks, such as 60 Hz line noise, and  
374 power values at  $\pm 5$  Hz around these high-frequency noise artifacts were removed. After this, we  
375 normalized the power spectra within each patient by the median power value across all channels  
376 and frequencies from 1-290 Hz (within that patient). In both humans and mice, we fit on all  
377 frequencies (excluding artifactual noise peaks) from 1 – 290 Hz. In humans, we used a peak  
378 sensitivity rating of 7, and in mice we used a peak sensitivity rating of 4. Peak width limits of 3-  
379 14 Hz were used in both species.

380 As a first control analysis, we replicated our results using a simple linear fit with a first-  
381 degree polynomial (polyfit.m) after both power spectra and the frequency axis were log  
382 transformed. This linear fit (in log-log space) found the same relationship between slope/offset  
383 and cortical depth (**Supplementary Fig. 6**), demonstrating that our results are robust to different  
384 fitting algorithms.

385 Another concern is that a correlation between the spectral parameterization algorithm's  
386 goodness of fit ( $r^2$ ) with cortical depth, offsets or slopes could yield spurious relationships  
387 between depth and offset or slope and offset. To ensure that this was not the case, we measured  
388 the Pearson correlation between goodness of fit and depth, slope and offset across all channels  
389 within our mouse and human datasets (separately). All of these correlations in humans were  
390 insignificant ( $r^2 \leq .006$ ,  $p \geq .14$ ), and were very weakly correlated (albeit significantly) in mice  
391 ( $r^2 \leq .06$ ,  $p \geq 1.05 * 10^{-7}$ ). We there for re-measured the average correlation between  
392 slope/offset and depth for only channels in a very narrow range of goodness of fits ( $r^2 = .99-1$ ),  
393 reducing the correlation between goodness of fit and depth, slope or offset. Even with this  
394 restricted range of channels, we observed high correlations of slope and offset to cortical depth  
395 ( $r^2 = .31, .48$  for slope and offset respectively). This suggests that our results cannot be explained  
396 by systematic variations in our fitting accuracy.

397 To make sure our slope-fitting wasn't contaminated by low-frequency oscillatory peaks  
398 (though these should be removed by the spectral parameterization algorithm), we replicated our  
399 results using a fitting band of 30 – 290 Hz. 30 Hz was chosen as a lower bound to exclude delta,  
400 theta, alpha and beta oscillations (**Supplementary Fig. 5**).

401 As a last control, we re-ran our fitting across a wide range of frequency bands. 1/f  
402 slope/offset and cortical depth were strongly correlated across almost all of these control bands  
403 (**Supplementary Fig. 4**). That these correlations remained even when the upper frequency bound  
404 was relatively low (<80 Hz) suggest that our results are not due to residual spiking contamination  
405 of the LFPg.

406 A point of potential conceptual confusion is our use of the aperiodic 1/f exponent, as  
407 opposed to the knee-frequency, to derive timescale. Though some previous papers have used the  
408 knee-frequency to measure the timescale (Gao et al., 2020), we rarely found spectral knees in our  
409 recordings. Furthermore, both the aperiodic exponent and spectral knee (usually not present in  
410 our data) determine LFPg timescale (Gao et al., 2020; Milotti, 2002) (**Supplementary Fig. 1**).  
411 This justifies our use of the aperiodic exponent instead of the knee-frequency for our analysis.

#### 412 *Model*

413 Our model is similar to earlier studies of 1/f dynamics (Freeman and Zhai, 2009; Gao et  
414 al., 2017; Miller et al., 2009a). We modelled LFPs as a convolution between Poisson spiking (30  
415 Hz for 490 seconds) and post-synaptic conductance kernels for AMPA and GABA<sub>A</sub> receptors.  
416 The number of Poisson spikes convolved with each receptor-type was equal to the (rounded)  
417 density in fmol/mg of that receptor. We then summed these convolutions within the  
418 supragranular/infragranular layers of each cortical area, yielding 88 artificial LFPS (Zilles and  
419 Palomero-Gallagher, 2017). The FFT was made using the same window and Hanning taper as  
420 our laminar recordings, and plotted in log-log space. Slopes were fitted in the same way as our  
421 empirical laminar recordings in humans (i.e. with the spectral parameterization algorithm from 1  
422 – 290 Hz, peak sensitivity of 7 and peak width limits of 3-14 Hz).

#### 423 *Code Accessibility*

424 Data and analysis scripts are freely available (<https://github.com/harnett/LaminarAperiodic>)

425

#### 426 **Acknowledgements**

427 We thank the patients for participating in this research and Eric Trautmann for the generous  
428 contribution of macaque laminar recordings, as well as Thomas Donoghue, Norma J. Brown,

429 Scott Cole, Enrique Toloza, Adam Niese, Dimitra Vardalaki and Ian Weaver for constructive  
430 feedback and technical support.

431 This work was supported by the Harvard MIT/Joint Research Grants Program in Basic  
432 Neuroscience and Tiny Blue Dot Foundation (M.T.H. & S.S.C.), as well as National Institutes of  
433 Health Grants R01-MH-099645, R01-EB-009282, R01-NS-062092, K24-NS-088568, the U.S.  
434 Office of Naval Research Grant N00014-13-1-0672 (E.H. & S.S.C), the MGH Executive Council  
435 on Research (S.S.C.), Hungarian National Brain Research Program grant KTIA\_13\_NAP-A-  
436 IV/1-4,6, EU FP7 600925 NeuroSeeker, and Hungarian Government grants KTIA-NAP 13-1-  
437 2013-0001, OTKA PD101754 (I.U., D.F., L.E., L.W.). M.T.H is a Klingenstein-Simons Fellow,  
438 a Vallee Foundation Scholar, and a McKnight Scholar.

439

#### 440 **Declaration of interests**

441 The authors declare no competing interests.

442

443

#### 444 **References**

445 Beaulieu-Laroche L, Toloza EHS, van der Goes MS, Lafourcade M, Barnagian D, Williams ZM,  
446 Eskandar EN, Frosch MP, Cash SS, Harnett MT. 2018. Enhanced Dendritic  
447 Compartmentalization in Human Cortical Neurons. *Cell*. doi:10.1016/j.cell.2018.08.045

448 Bédard C, Destexhe A. 2009. Macroscopic models of local field potentials and the apparent 1/f  
449 noise in brain activity. *Biophys J*. doi:10.1016/j.bpj.2008.12.3951

450 Bédard C, Kröger H, Destexhe A. 2006. Does the 1/f frequency scaling of brain signals reflect  
451 self-organized critical states? *Phys Rev Lett*. doi:10.1103/PhysRevLett.97.118102

452 Beggs JM, Plenz D. 2003. Neuronal Avalanches in Neocortical Circuits. *J Neurosci*.  
453 doi:10.1523/jneurosci.23-35-11167.2003

454 Blume WT. 2006. Drug effects on EEG. *J Clin Neurophysiol* **23**:306–311.  
455 doi:10.1097/01.wnp.0000229137.94384.fa

456 Bódizs R, Szalárdy O, Horváth C, Ujma PP, Gombos F, Simor P, Pótári A, Zeising M, Steiger A,  
457 Dresler M. 2021. A set of composite, non-redundant EEG measures of NREM sleep based  
458 on the power law scaling of the Fourier spectrum. *Sci Rep*. doi:10.1038/s41598-021-81230-  
459 7

460 Buzsáki G, Anastassiou C a., Koch C. 2012. The origin of extracellular fields and currents —

- 461 EEG, ECoG, LFP and spikes. *Nat Rev Neurosci* **13**:407–420. doi:10.1038/nrn3241
- 462 Buzsáki G, Draguhn A. 2004. Neuronal Oscillations in Cortical Networks. *Sci* **304**:1926–1929.  
463 doi:10.1126/science.1099745
- 464 Cash SS, Halgren E, Dehghani N, Rossetti AO, Thesen T, Wang C, Devinsky O, Kuzniecky R,  
465 Doyle W, Madsen JR, Bromfield E, Eross L, Halasz P, Karmos G, Csercsa R, Wittner L,  
466 Ulbert I. 2009. The Human K-Complex Represents an Isolated Cortical Down-State.  
467 *Science (80- )* **324**:1084–1087. doi:10.1126/science.1169626
- 468 Chaudhuri R, He BJ, Wang XJ. 2018. Random recurrent networks near criticality capture the  
469 broadband power distribution of human ECoG dynamics. *Cereb Cortex*.  
470 doi:10.1093/cercor/bhx233
- 471 Colombo MA, Napolitani M, Boly M, Gosseries O, Casarotto S, Rosanova M, Bricchant J-F,  
472 Boveroux P, Rex S, Laureys S, Massimini M, Chiaregato A, Sarasso S. 2019. The spectral  
473 exponent of the resting EEG indexes the presence of consciousness during  
474 unresponsiveness induced by propofol, xenon, and ketamine. *Neuroimage* **189**:631–644.  
475 doi:<https://doi.org/10.1016/j.neuroimage.2019.01.024>
- 476 Csercsa R, Dombovári B, Fabó D, Wittner L, Eröss L, Entz L, Sólyom A, Rásonyi G, Szűcs A,  
477 Kelemen A, Jakus R, Juhos V, Grand L, Magony A, Halász P, Freund TF, Maglóczy Z,  
478 Cash SS, Papp L, Karmos G, Halgren E, Ulbert I. 2010. Laminar analysis of slow wave  
479 activity in humans. *Brain* **133**:2814–2829.
- 480 Dave S, Brothers TA, Swaab TY. 2018. 1/f neural noise and electrophysiological indices of  
481 contextual prediction in aging. *Brain Res* **1691**:34–43.  
482 doi:<https://doi.org/10.1016/j.brainres.2018.04.007>
- 483 Donoghue T, Haller M, Peterson EJ, Varma P, Sebastian P, Gao R, Noto T, Lara AH, Wallis JD,  
484 Knight RT, Shestyuk A, Voytek B. 2020. Parameterizing neural power spectra into periodic  
485 and aperiodic components. *Nat Neurosci*. doi:10.1038/s41593-020-00744-x
- 486 Eickhoff SB, Rottschy C, Zilles K. 2007. Laminar distribution and co-distribution of  
487 neurotransmitter receptors in early human visual cortex. *Brain Struct Funct* **212**:255–267.  
488 doi:10.1007/s00429-007-0156-y
- 489 Freeman WJ, Zhai J. 2009. Simulated power spectral density (PSD) of background  
490 electrocorticogram (ECoG). *Cogn Neurodyn* **3**:97–103. doi:10.1007/s11571-008-9064-y
- 491 Gao R. 2016. Interpreting the electrophysiological power spectrum. *J Neurophysiol*.  
492 doi:10.1152/jn.00722.2015
- 493 Gao R, Peterson EJ, Voytek B. 2017. Inferring synaptic excitation/inhibition balance from field  
494 potentials. *Neuroimage* **158**:70–78. doi:10.1016/j.neuroimage.2017.06.078
- 495 Gao R, Van den Brink RL, Pfeffer T, Voytek B. 2020. Neuronal timescales are functionally  
496 dynamic and shaped by cortical microarchitecture. *Elife*. doi:10.7554/eLife.61277
- 497 Haegens S, Barczak A, Musacchia G, Lipton ML, Mehta AD, Lakatos P, Schroeder CE. 2015.  
498 Laminar Profile and Physiology of the  $\alpha$  Rhythm in Primary Visual, Auditory, and  
499 Somatosensory Regions of Neocortex. *J Neurosci* **35**:14341–52.



- 500 doi:10.1523/JNEUROSCI.0600-15.2015
- 501 Halgren E, Kaestner E, Marinkovic K, Cash SS, Wang C, Schomer DL, Madsen JR, Ulbert I.  
502 2015. Laminar profile of spontaneous and evoked theta: Rhythmic modulation of cortical  
503 processing during word integration. *Neuropsychologia* **76**:108–124.  
504 doi:10.1016/j.neuropsychologia.2015.03.021
- 505 Halgren M, Fabó D, Ulbert I, Madsen JR, Eröss L, Doyle WK, Devinsky O, Schomer D, Cash  
506 SS, Halgren E. 2018. Superficial Slow Rhythms Integrate Cortical Processing in Humans.  
507 *Sci Rep* **8**:2055. doi:10.1038/s41598-018-20662-0
- 508 Halgren M, Ulbert I, Bastuji H, Fabó D, Eröss L, Rey M, Devinsky O, Doyle WK, Mak-McCully  
509 R, Halgren E, Wittner L, Chauvel P, Heit G, Eskandar E, Mandell A, Cash SS. 2019. The  
510 generation and propagation of the human alpha rhythm. *Proc Natl Acad Sci* 201913092.  
511 doi:10.1073/pnas.1913092116
- 512 Harnett MT, Magee JC, Williams SR. 2015. Distribution and function of HCN channels in the  
513 apical dendritic tuft of neocortical pyramidal neurons. *J Neurosci*.  
514 doi:10.1523/JNEUROSCI.2813-14.2015
- 515 He BJ, Zempel JM, Snyder AZ, Raichle ME. 2010. The temporal structures and functional  
516 significance of scale-free brain activity. *Neuron* **66**:353–369.  
517 doi:10.1016/j.neuron.2010.04.020
- 518 He BYJ. 2014. Scale-free brain activity: past, present, and future. *Trends Cogn Sci* **18**:480–487.  
519 doi:10.1016/J.Tics.2014.04.003
- 520 Hutsler JJ, Lee D-G, Porter KK. 2005. Comparative analysis of cortical layering and  
521 supragranular layer enlargement in rodent carnivore and primate species. *Brain Res*  
522 **1052**:71–81. doi:10.1016/j.brainres.2005.06.015
- 523 Kajikawa Y, Schoeder E. 2012. How local is the local field potential? *Neuron* **72**:847–858.  
524 doi:10.1016/j.neuron.2011.09.029.How
- 525 Kajikawa Y, Schroeder CE. 2015. Generation of field potentials and modulation of their  
526 dynamics through volume integration of cortical activity. *J Neurophysiol* **113**:339–351.  
527 doi:10.1152/jn.00914.2013
- 528 Kalmbach B, Buchin A, Miller JA, Bakken TE, Hodge RD, Chong P, de Frates R, Dai K, Gwinn  
529 RP, Cobbs C, Ko AL, Ojemann JG, Silbergeld DL, Koch C, Anastassiou CA, Lein E, Ting  
530 JT. 2018. h-channels contribute to divergent electrophysiological properties of  
531 supragranular pyramidal neurons in human versus mouse cerebral cortex. *bioRxiv*.
- 532 Kandel ER, Schwartz J, Jessel TM, Siegelbaum SA, Hudspeth AJ. 1991. Principles of Neural  
533 Science, Fifth Edition, Elsevier.
- 534 Kiebel SJ, Daunizeau J, Friston KJ. 2008. A hierarchy of time-scales and the brain. *PLoS*  
535 *Comput Biol*. doi:10.1371/journal.pcbi.1000209
- 536 Kole MHP, Hallermann S, Stuart GJ. 2006. Single  $I_h$  Channels in Pyramidal Neuron  
537 Dendrites: Properties, Distribution, and Impact on Action Potential Output. *J Neurosci*  
538 **26**:1677 LP – 1687.

- 539 Lendner JD, Helfrich RF, Mander BA, Romundstad L, Lin JJ, Walker MP, Larsson PG, Knight  
540 RT. 2020. An electrophysiological marker of arousal level in humans. *Elife*.  
541 doi:10.7554/eLife.55092
- 542 Logothetis NK, Kayser C, Oeltermann A. 2007. In vivo measurement of cortical impedance  
543 spectrum in monkeys: implications for signal propagation. *Neuron* **55**:809–23.  
544 doi:10.1016/j.neuron.2007.07.027
- 545 Manning JR, Jacobs J, Fried I, Kahana MJ. 2009. Broadband Shifts in Local Field Potential  
546 Power Spectra Are Correlated with Single-Neuron Spiking in Humans. *J Neurosci*  
547 **29**:13613–13620. doi:10.1523/JNEUROSCI.2041-09.2009
- 548 Markov NT, Vezoli J, Chameau P, Falchier A, Quilodran R, Huissoud C, Lamy C, Misery P,  
549 Giroud P, Ullman S, Barone P, Dehay C, Knoblauch K, Kennedy H. 2014. Anatomy of  
550 hierarchy: Feedforward and feedback pathways in macaque visual cortex. *J Comp Neurol*  
551 **522**:225–259. doi:10.1002/cne.23458
- 552 Miller KJ, Sorensen LB, Ojemann JG, Den Nijs M. 2009a. Power-law scaling in the brain  
553 surface electric potential. *PLoS Comput Biol* **5**. doi:10.1371/journal.pcbi.1000609
- 554 Miller KJ, Zanos S, Fetz EE, Den Nijs M, Ojemann JG. 2009b. Decoupling the cortical power  
555 spectrum reveals real-time representation of individual finger movements in humans. *J*  
556 *Neurosci*. doi:10.1523/JNEUROSCI.5506-08.2009
- 557 Milotti E. 2002. 1/f Noise: A pedagogical review. *Arxiv Phys*.
- 558 Murray JD, Bernacchia A, Freedman DJ, Romo R, Wallis JD, Cai X, Padoa-Schioppa C,  
559 Pasternak T, Seo H, Lee D, Wang X-J. 2014. A hierarchy of intrinsic timescales across  
560 primate cortex. *Nat Neurosci* **17**:1661–3. doi:10.1038/nn.3862
- 561 Ness T V, Remme MWH, Einevoll GT. 2018. h-type membrane current shapes the local field  
562 potential (LFP) from populations of pyramidal neurons. *J Neurosci*.
- 563 Oostenveld R, Fries P, Maris E, Schoffelen J-M. 2011. FieldTrip: Open Source Software for  
564 Advanced Analysis of MEG, EEG, and Invasive Electrophysiological Data. *Comput Intell*  
565 *Neurosci* **2011**:1–9. doi:10.1155/2011/156869
- 566 Ouyang G, Hildebrandt A, Schmitz F, Herrmann CS. 2020. Decomposing alpha and 1/f brain  
567 activities reveals their differential associations with cognitive processing speed.  
568 *Neuroimage* **205**:116304. doi:https://doi.org/10.1016/j.neuroimage.2019.116304
- 569 Podvalny E, Noy N, Harel M, Bickel S, Chechik G, Schroeder CE, Mehta AD, Tsodyks M,  
570 Malach R. 2015. A unifying principle underlying the extracellular field potential spectral  
571 responses in the human cortex. *J Neurophysiol*. doi:10.1152/jn.00943.2014
- 572 Robertson MM, Furlong S, Voytek B, Donoghue T, Boettiger CA, Sheridan MA. 2019. EEG  
573 power spectral slope differs by ADHD status and stimulant medication exposure in early  
574 childhood. *J Neurophysiol*. doi:10.1152/jn.00388.2019
- 575 Runyan CA, Piasini E, Panzeri S, Harvey CD. 2017. Distinct timescales of population coding  
576 across cortex. *Nature*. doi:10.1038/nature23020

- 577 Schaworonkow N, Voytek B. 2021. Longitudinal changes in aperiodic and periodic activity in  
578 electrophysiological recordings in the first seven months of life. *Dev Cogn Neurosci*.  
579 doi:10.1016/j.dcn.2020.100895
- 580 Shirhatti V, Borthakur A, Ray S. 2016. Effect of reference scheme on power and phase of the  
581 local field potential. *Neural Comput*. doi:10.1162/NECO\_a\_00827
- 582 Siegle JH, Jia X, Durand S, Gale S, Bennett C, Graddis N, Heller G, Ramirez TK, Choi H,  
583 Luviano JA, Groblewski PA, Ahmed R, Arkhipov A, Bernard A, Billeh YN, Brown D,  
584 Buice MA, Cain N, Caldejon S, Casal L, Cho A, Chvilicek M, Cox TC, Dai K, Denman DJ,  
585 de Vries SEJ, Dietzman R, Esposito L, Farrell C, Feng D, Galbraith J, Garrett M, Gelfand  
586 EC, Hancock N, Harris JA, Howard R, Hu B, Hytnen R, Iyer R, Jessett E, Johnson K, Kato  
587 I, Kiggins J, Lambert S, Lecoq J, Ledochowitsch P, Lee JH, Leon A, Li Y, Liang E, Long F,  
588 Mace K, Melchior J, Millman D, Mollenkopf T, Nayan C, Ng L, Ngo K, Nguyen T,  
589 Nicovich PR, North K, Ocker GK, Ollerenshaw D, Oliver M, Pachitariu M, Perkins J,  
590 Reding M, Reid D, Robertson M, Ronellenfitch K, Seid S, Slaughterbeck C, Stoecklin M,  
591 Sullivan D, Sutton B, Swapp J, Thompson C, Turner K, Wakeman W, Whitesell JD,  
592 Williams D, Williford A, Young R, Zeng H, Naylor S, Phillips JW, Reid RC, Mihalas S,  
593 Olsen SR, Koch C. 2021. Survey of spiking in the mouse visual system reveals functional  
594 hierarchy. *Nature*. doi:10.1038/s41586-020-03171-x
- 595 Spitmaan M, Seo H, Lee D, Soltani A. 2020. Multiple timescales of neural dynamics and  
596 integration of task-relevant signals across cortex. *Proc Natl Acad Sci U S A*.  
597 doi:10.1073/pnas.2005993117
- 598 Steinmetz NA, Zatka-Haas P, Carandini M, Harris KD. 2019. Distributed coding of choice,  
599 action and engagement across the mouse brain. *Nature*. doi:10.1038/s41586-019-1787-x
- 600 Stock A-K, Pertermann M, Mückschel M, Beste C. 2019. High-dose ethanol intoxication  
601 decreases 1/f neural noise or scale-free neural activity in the resting state. *Addict Biol*  
602 **n/a**:e12818. doi:10.1111/adb.12818
- 603 Timmermann C, Roseman L, Schartner M, Milliere R, Williams LTJ, Erritzoe D,  
604 Muthukumaraswamy S, Ashton M, Bendrioua A, Kaur O, Turton S, Nour MM, Day CM,  
605 Leech R, Nutt DJ, Carhart-Harris RL. 2019. Neural correlates of the DMT experience  
606 assessed with multivariate EEG. *Sci Rep* **9**:16324. doi:10.1038/s41598-019-51974-4
- 607 Trongnetrpunya A, Nandi B, Kang D, Kocsis B, Schroeder CE, Ding M. 2016. Assessing  
608 Granger Causality in Electrophysiological Data: Removing the Adverse Effects of Common  
609 Signals via Bipolar Derivations. *Front Syst Neurosci* **9**. doi:10.3389/fnsys.2015.00189
- 610 Ulbert István, Halgren E, Heit G, Karmos G. 2001. Multiple microelectrode-recording system for  
611 human intracortical applications. *J Neurosci Methods* **106**:69–79. doi:10.1016/S0165-  
612 0270(01)00330-2
- 613 Ulbert Istvan, Karmos G, Heit G, Halgren E. 2001. Early discrimination of coherent versus  
614 incoherent motion by multiunit and synaptic activity in human putative MT+. *Hum Brain*  
615 *Mapp* **13**:226–238. doi:10.1002/hbm.1035
- 616 V. Stewart C, Plenz D. 2006. Inverted-U Profile of Dopamine-NMDA-Mediated Spontaneous  
617 Avalanche Recurrence in Superficial Layers of Rat Prefrontal Cortex. *J Neurosci* **26**:8148–

- 618 8159. doi:10.1523/JNEUROSCI.0723-06.2006
- 619 Veerakumar A, Tiruvadi V, Howell B, Waters AC, Crowell AL, Voytek B, Riva-Posse P,  
620 Denison L, Rajendra JK, Edwards JA, Bijanki KR, Choi KS, Mayberg HS. 2019. Field  
621 potential 1/f activity in the subcallosal cingulate region as a candidate signal for monitoring  
622 deep brain stimulation for treatment-resistant depression. *J Neurophysiol*.  
623 doi:10.1152/jn.00875.2018
- 624 Voytek B, Kramer MA, Case J, Lepage KQ, Tempesta ZR, Knight RT, Gazzaley A. 2015. Age-  
625 Related Changes in 1/f Neural Electrophysiological Noise. *J Neurosci* **35**:13257–13265.  
626 doi:10.1523/JNEUROSCI.2332-14.2015
- 627 Wang Q, Ding SL, Li Y, Royall J, Feng D, Lesnar P, Graddis N, Naeemi M, Facer B, Ho A,  
628 Dolbeare T, Blanchard B, Dee N, Wakeman W, Hirokawa KE, Szafer A, Sunkin SM, Oh  
629 SW, Bernard A, Phillips JW, Hawrylycz M, Koch C, Zeng H, Harris JA, Ng L. 2020. The  
630 Allen Mouse Brain Common Coordinate Framework: A 3D Reference Atlas. *Cell*.  
631 doi:10.1016/j.cell.2020.04.007
- 632 Waschke L, Donoghue T, Fiedler L, Smith S, Garrett DD, Voytek B, Obleser J. 2021. Modality-  
633 specific tracking of attention and sensory statistics in the human electrophysiological  
634 spectral exponent. *bioRxiv*.
- 635 Zilles K, Palomero-Gallagher N. 2017. Multiple transmitter receptors in regions and layers of the  
636 human cerebral cortex. *Front Neuroanat*. doi:10.3389/fnana.2017.00078
- 637
- 638

639 **Table 1**

| <b>Expt #</b> | <b>Cortical Area</b>       | <b>Mouse</b> | <b>Session Label(s)</b>                                          |
|---------------|----------------------------|--------------|------------------------------------------------------------------|
| 1             | Primary motor area         | Moniz        | Moniz_2017-05-18                                                 |
| 2             | Primary motor area         | Radnitz      | Radnitz_2017-01-12                                               |
| 3             | Secondary motor area       | Muller       | Muller_2017-01-07                                                |
| 4             | Secondary motor area       | Radnitz      | Radnitz_2017-01-08,<br>Radnitz_2017-01-09,<br>Radnitz_2017-01-10 |
| 5             | Retrosplenial area         | Lederberg    | Lederberg_2017-12-07                                             |
| 6             | Retrosplenial area         | Radnitz      | Radnitz_2017-01-11                                               |
| 7             | Primary somatosensory area | Moniz        | Moniz_2017-05-18                                                 |
| 8             | Primary somatosensory area | Radnitz      | Radnitz_2017-01-12                                               |
| 9             | Anterior visual area       | Hench        | Hench_2017-06-15                                                 |
| 10            | Anterior visual area       | Moniz        | Moniz_2017-05-16                                                 |
| 11            | Anterior visual area       | Richards     | Richards_2017-10-29                                              |
| 12            | Anteromedial visual area   | Moniz        | Moniz_2017-05-15                                                 |
| 13            | Anteromedial visual area   | Radnitz      | Radnitz_2017-01-10                                               |
| 14            | Primary visual area        | Cori         | Cori_2016-12-14,<br>Cori_2016-12-18                              |
| 15            | Primary visual area        | Forssmann    | Forssmann_2017-11-01                                             |
| 16            | Primary visual area        | Hench        | Hench_2017-06-15,<br>Hench_2017-06-17                            |
| 17            | Primary visual area        | Lederberg    | Lederberg_2017-12-05                                             |
| 18            | Primary visual area        | Moniz        | Moniz_2017-05-16                                                 |
| 19            | Primary visual area        | Theiler      | Theiler_2017-10-11                                               |

640

641

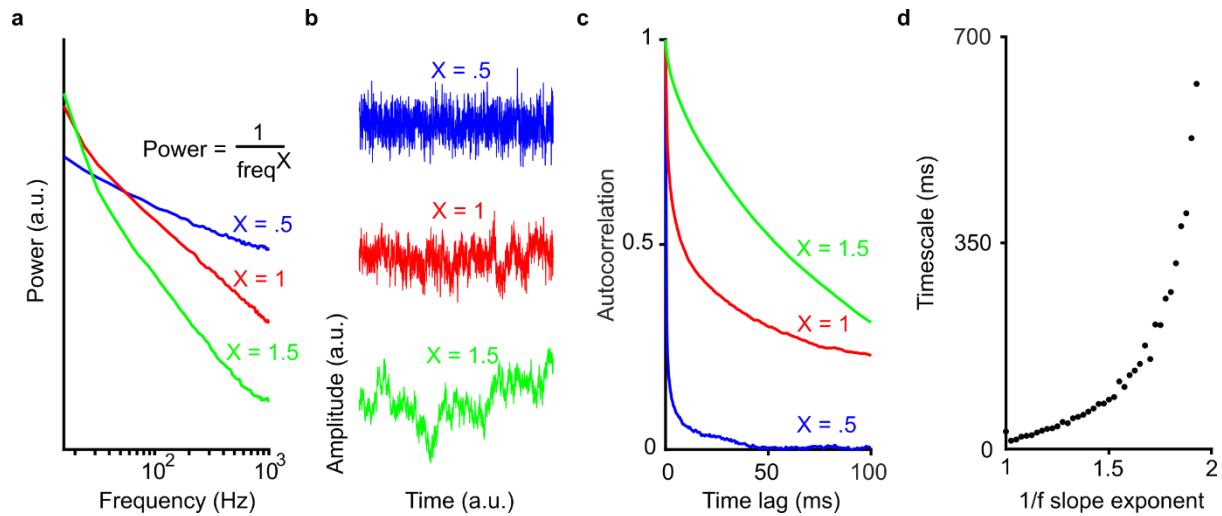

642

643 **Supplementary Figure 1:** 1/f slope reflects timescale of activity in the time-domain. **a)** Three simulated  
644 power spectra with different slope exponents (.5, 1, 1.5). **b)** 1 s of simulated time series corresponding to  
645 the spectra in a. Note that the time series with the slowest fluctuations corresponds to the spectrum with  
646 the steepest exponent. **c)** Autocorrelation functions for the three simulated timeseries in b. The highest  
647 autocorrelation function (i.e. most time dependence or memory) corresponds to the steepest power  
648 spectrum ( $X = 1.5$ ). **d)** Timescale as a function of slope exponent for 38 simulated time series (slopes  
649 between 1 and 2). Timescale is defined as the lag at which the autocorrelation decays to  $1/e$ .



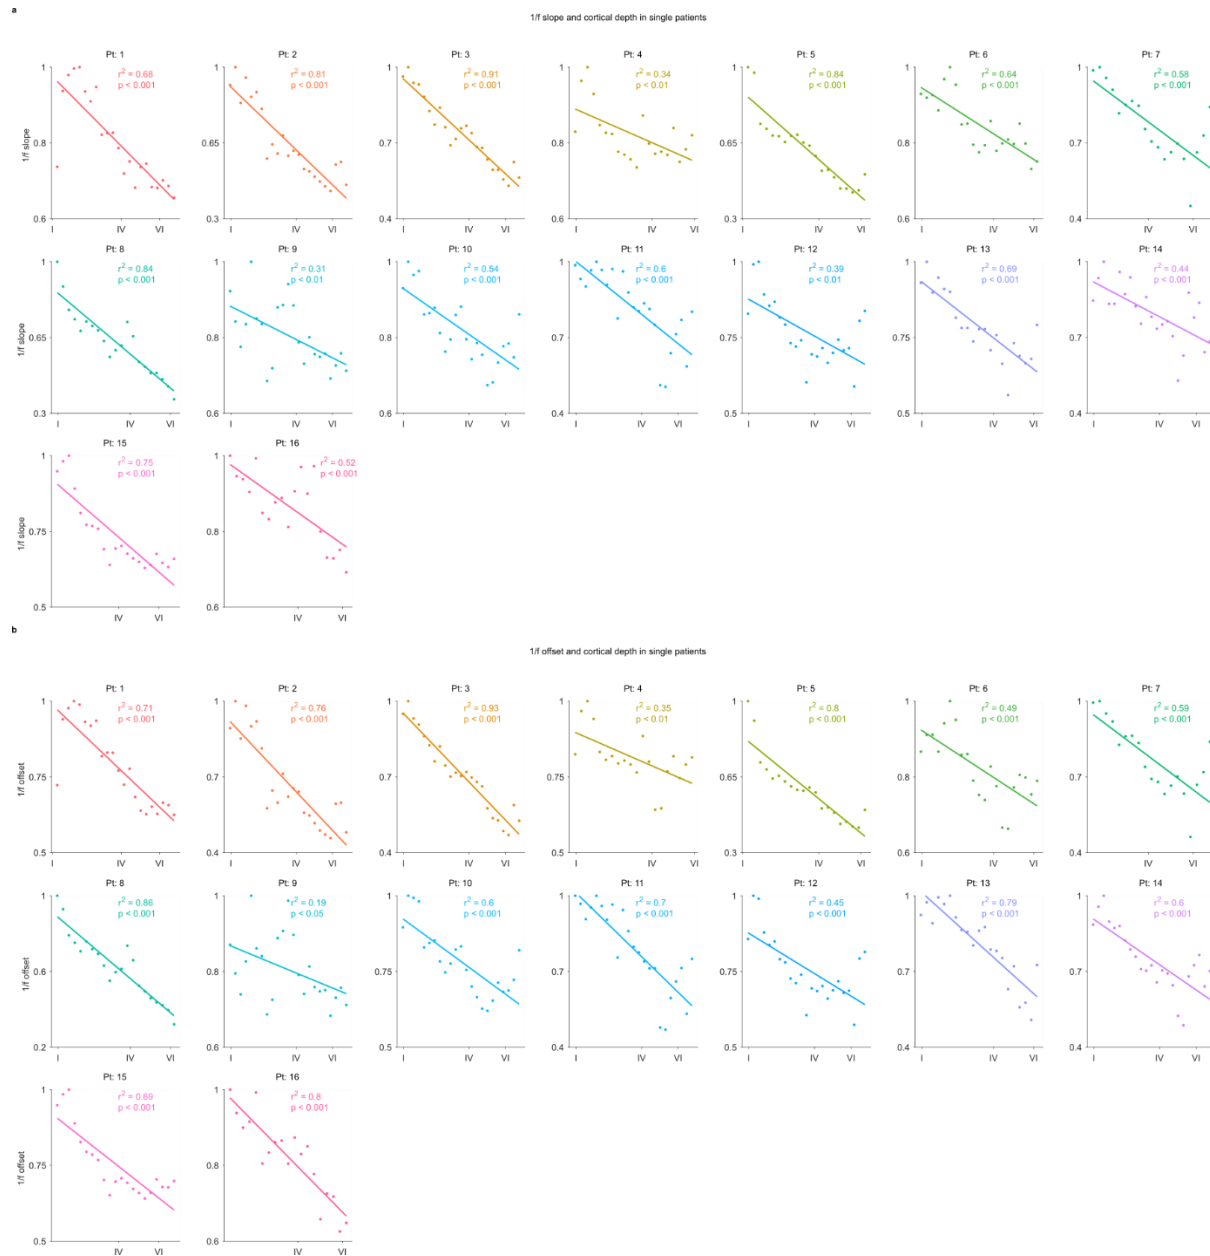

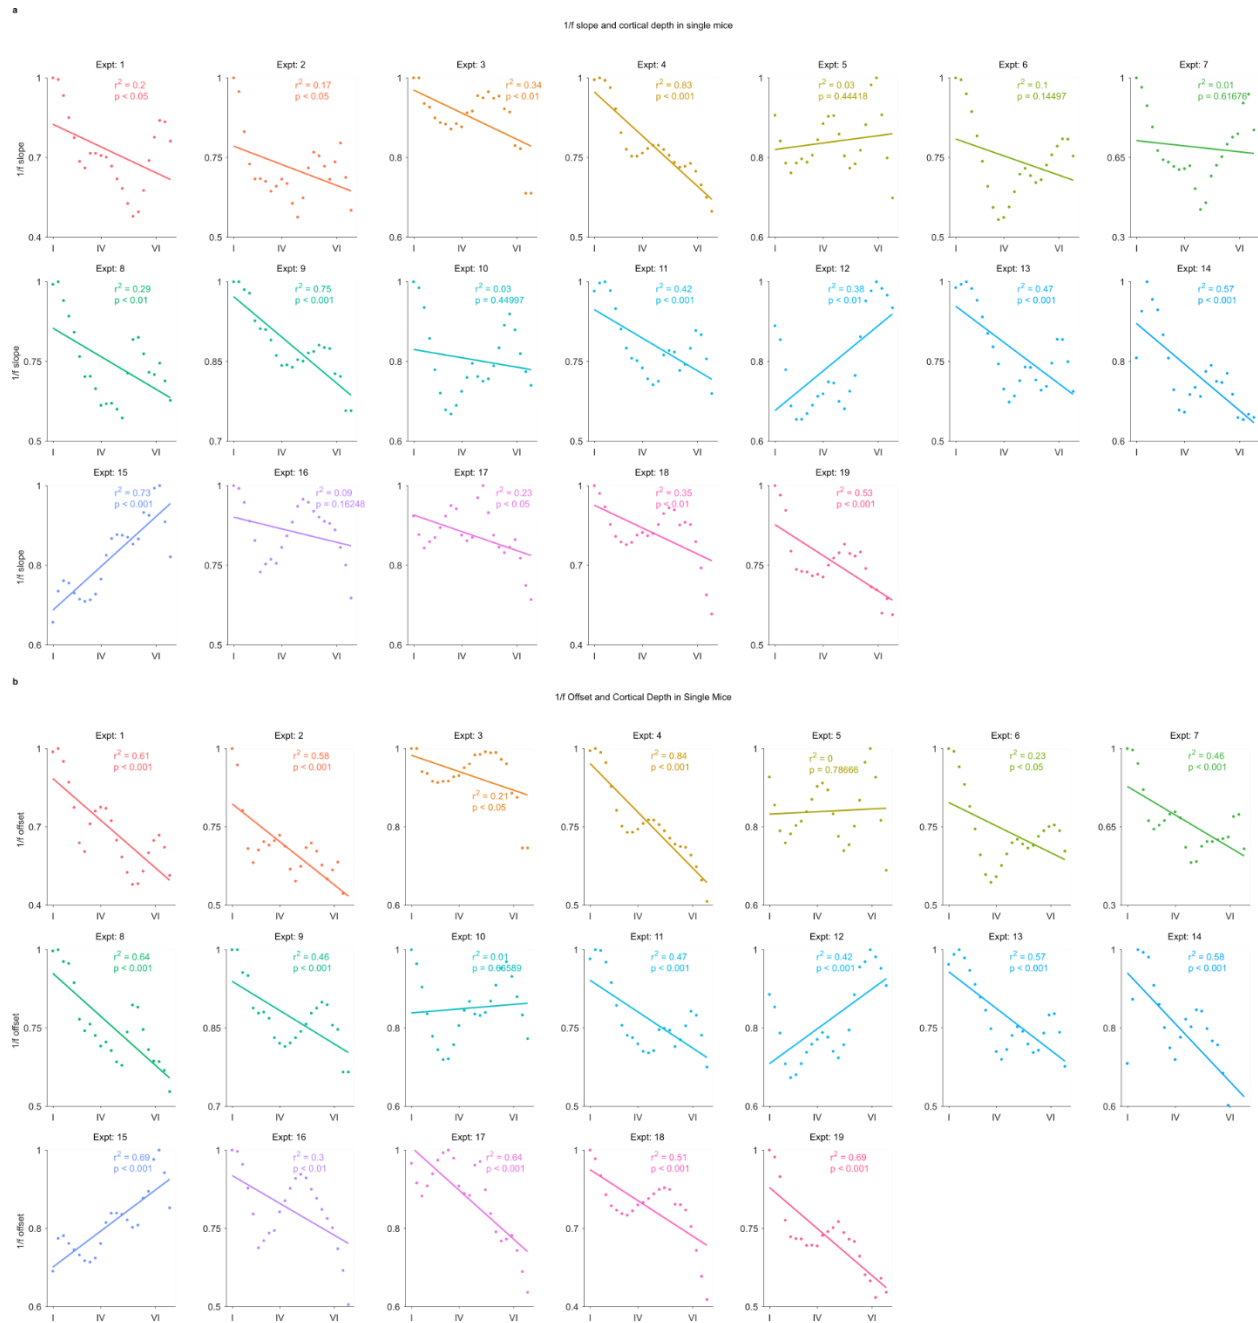

653

654 **Supplementary Fig. 3** 1/f slope and offset decrease with cortical depth in individual mouse experiments.  
655 1/f slope (a) and offset (b) vs. cortical depth (x-axis) in all mouse experiments.

656

657

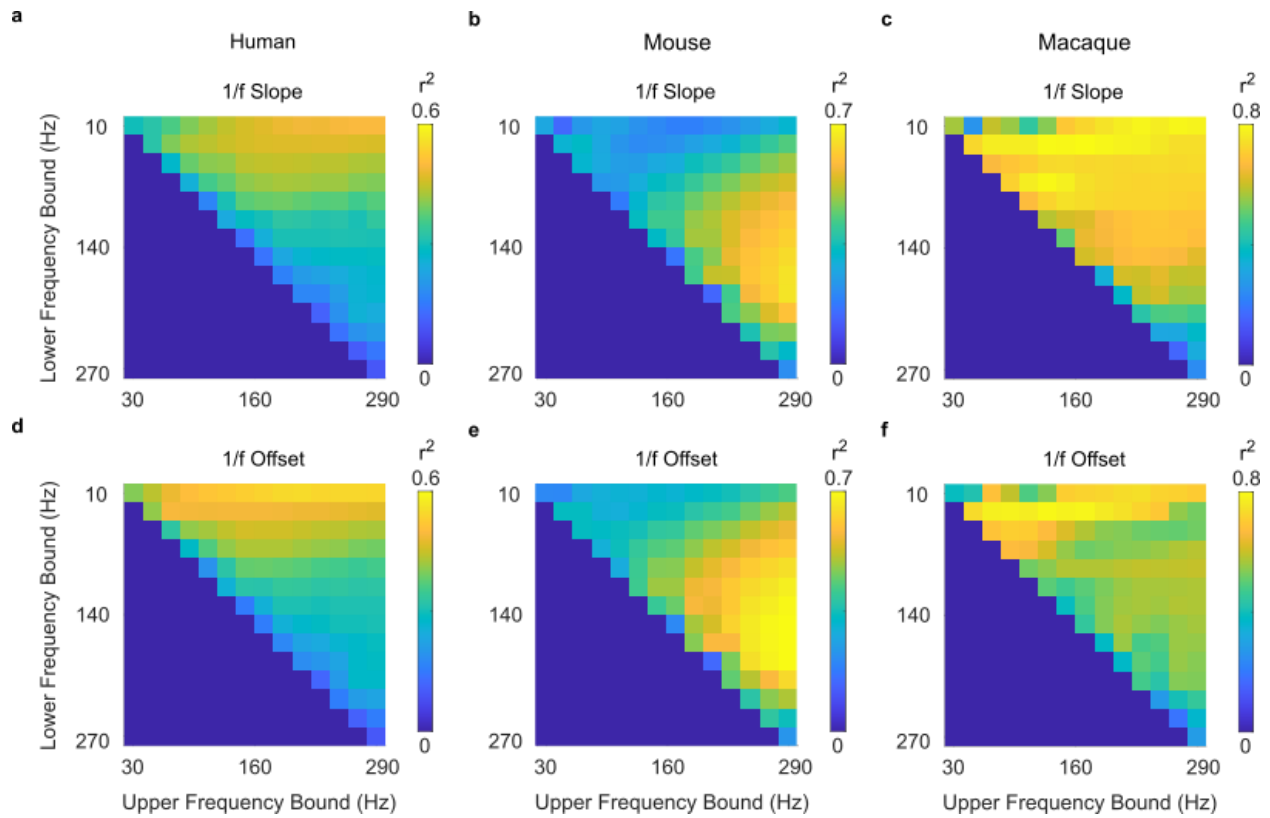

658

659 **Supplementary Fig. 4** 1/f slope and cortical depth are highly correlated across a wide range of frequency  
660 bands. For every frequency band between 10 and 270 Hz (20 Hz intervals), we found the correlation ( $r^2$ )  
661 between 1/f slope or offset and depth within each patient (human) / experiment (mouse, macaque), and  
662 then averaged this value across patients / sessions.

663

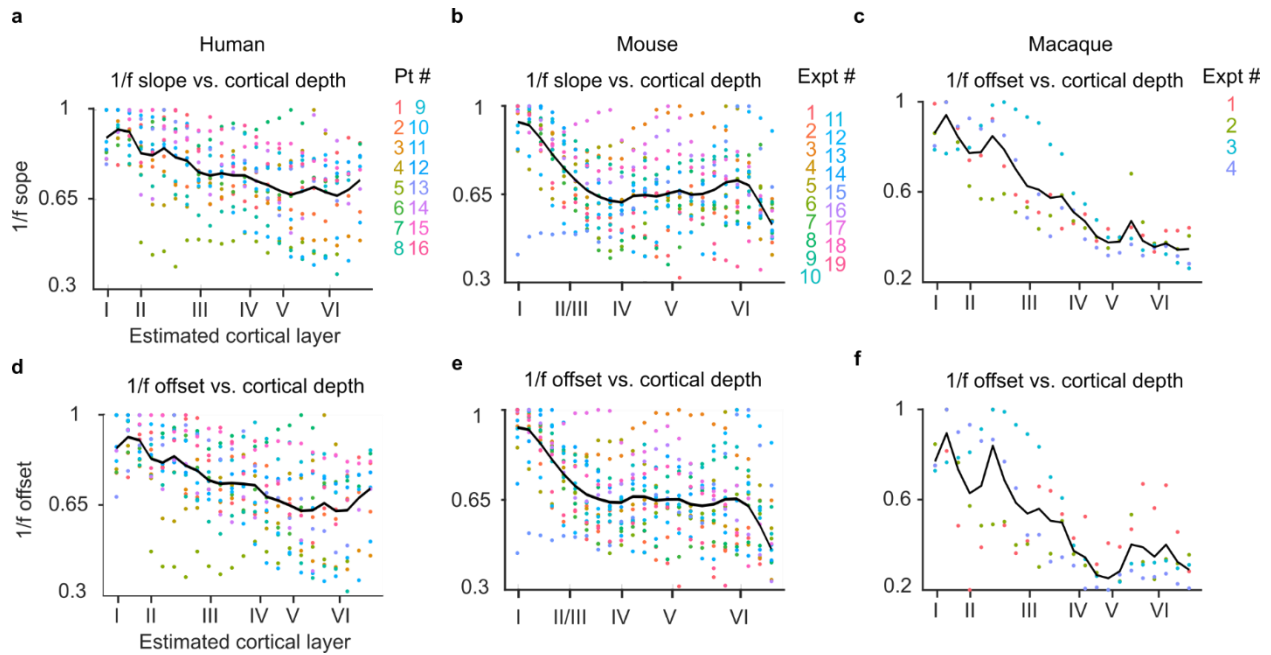

664

665 **Supplementary Fig. 5** 1/f slope flattens and offset decreases with cortical depth from 30-290 Hz. 1/f slope  
666 and offset vs. cortical depth in humans (a, d), mice (b, e) and macaques (c, f), fit using a frequency band  
667 of 30-290 Hz (as opposed to 1-290 Hz in our main results).

668

669

670

671

672

673

674

675

676

677

678

679

680

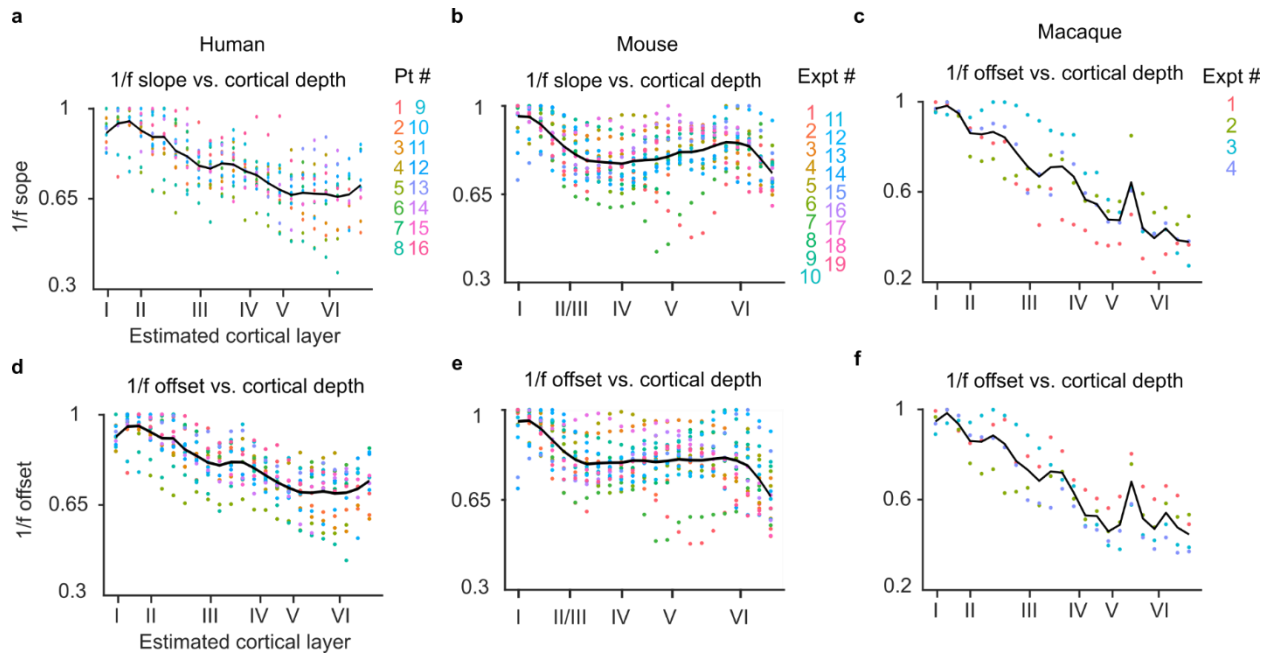

681

682 **Supplementary Fig. 6** 1/f slope and offsets fit with simple linear regression (polyfit.m) instead of the  
683 spectral parameterization algorithm yields similar results. 1/f slope and offsets across all humans (a, d),  
684 mice (b, e), and macaques (c, f) normalized within each experiment.
